# Supplementary material for: SUMO Modification Regulates BLM and RAD51 Interaction at Damaged Replication Forks
Source: PLOS journal article supplement (doi:10.1371/journal.pbio.1000252), 2009-11-30

**Figure S1**

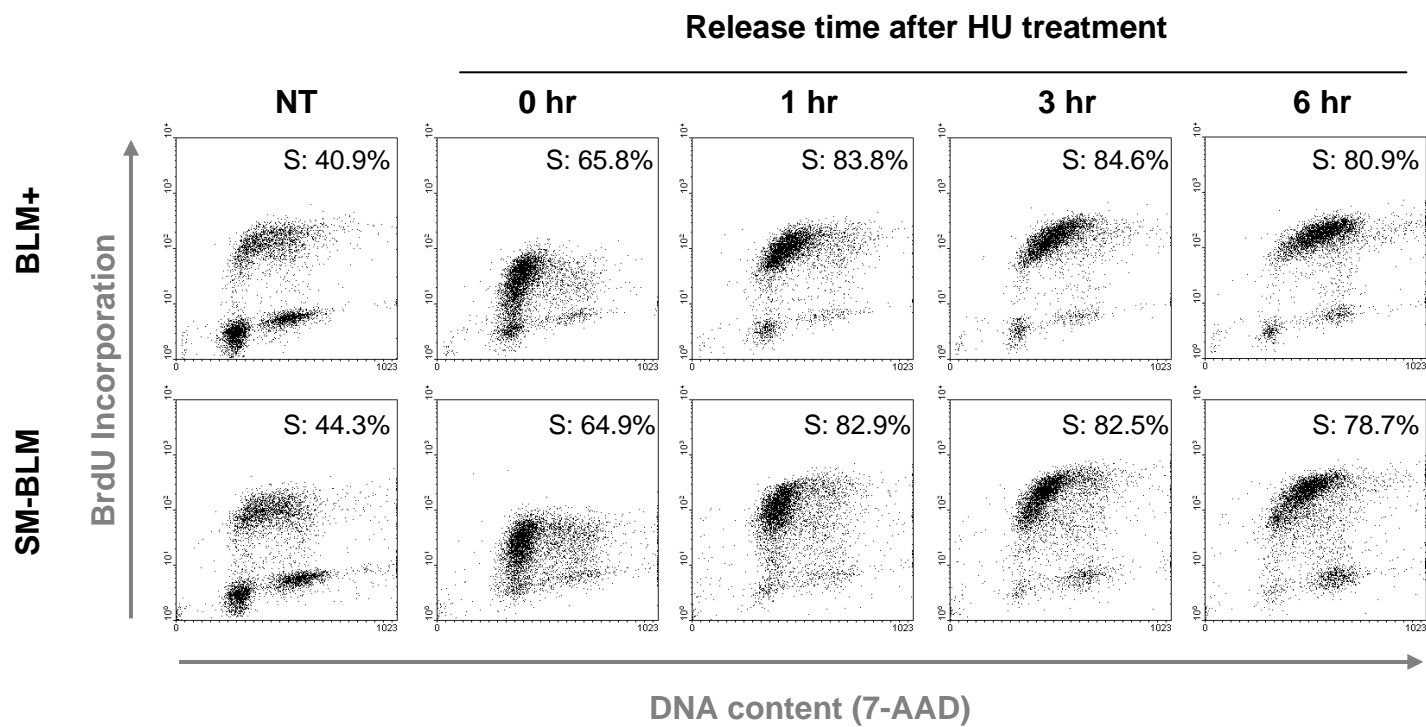

Supplement: S1 (10.1371/journal.pbio.1000252.s001) [file journal.pbio.1000252.s001.pdf › journal.pbio.1000252.s001.pdf]
