# Supplementary material for: SUMO Modification Regulates BLM and RAD51 Interaction at Damaged Replication Forks
Source: PLOS journal article supplement (doi:10.1371/journal.pbio.1000252), 2009-11-30

**Figure S6**

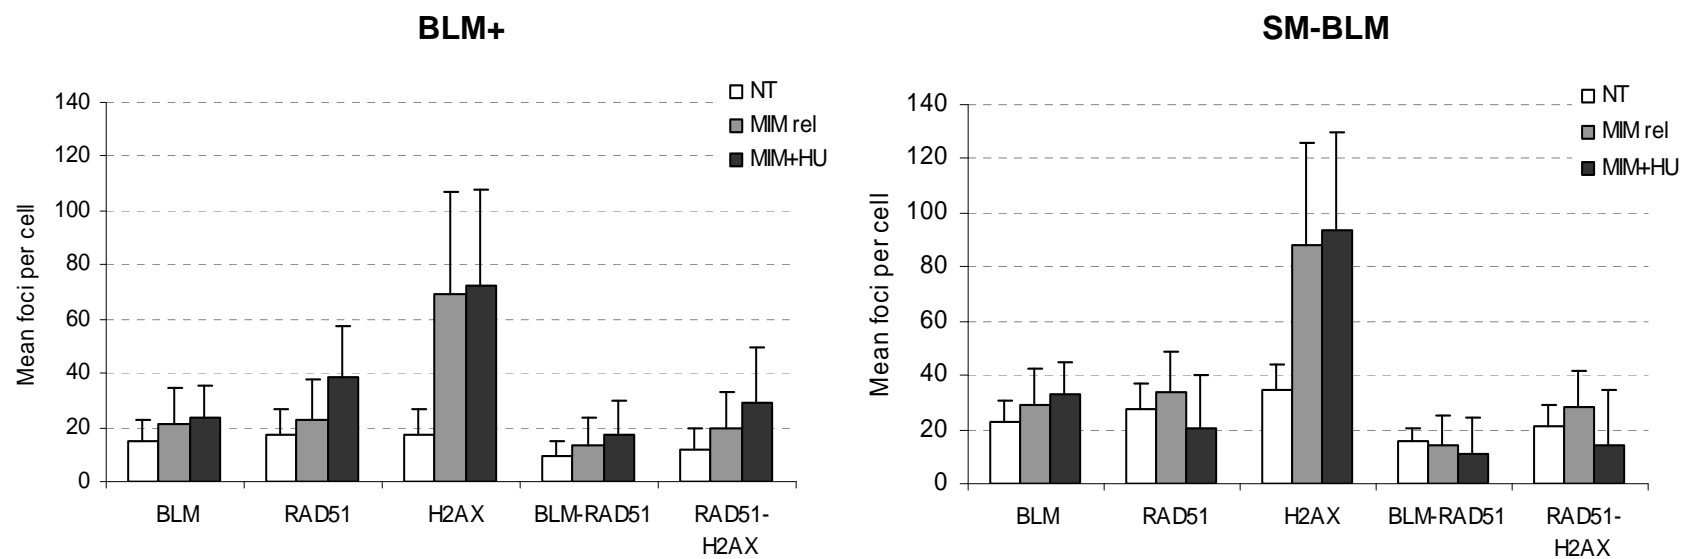

Supplement: S6 (10.1371/journal.pbio.1000252.s006) [file journal.pbio.1000252.s006.pdf › journal.pbio.1000252.s006.pdf]
