# Supplementary material for: SUMO Modification Regulates BLM and RAD51 Interaction at Damaged Replication Forks
Source: PLOS journal article supplement (doi:10.1371/journal.pbio.1000252), 2009-11-30

**Figure S7**

**A**

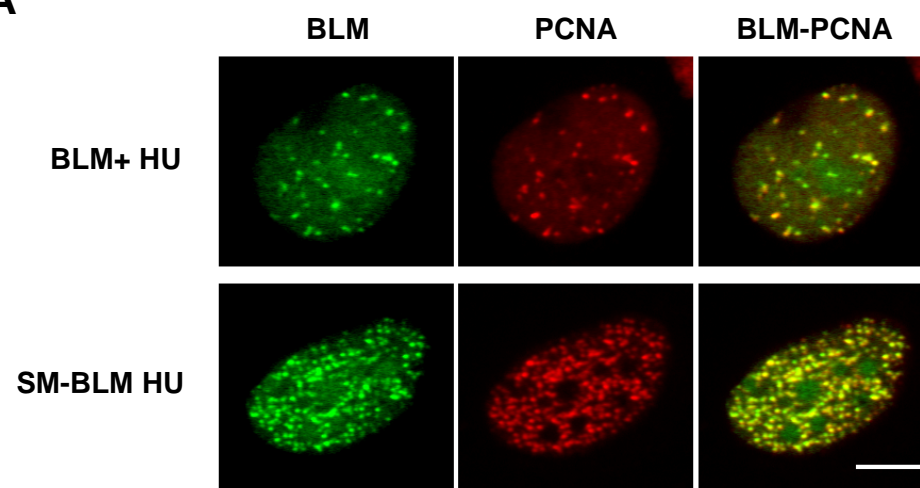

**B**

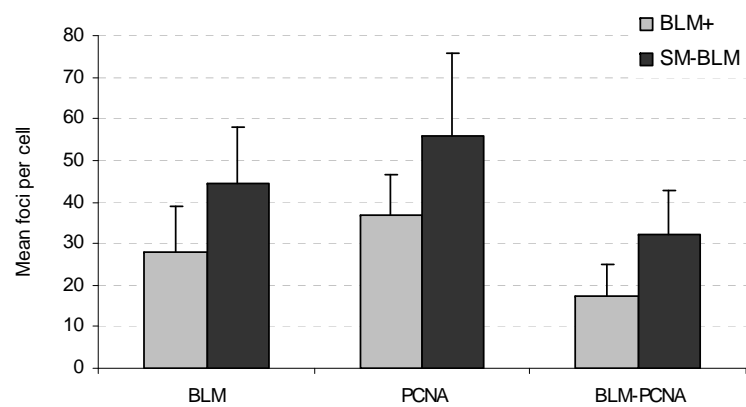

Supplement: S7 (10.1371/journal.pbio.1000252.s007) [file journal.pbio.1000252.s007.pdf › journal.pbio.1000252.s007.pdf]
